# Supplementary material for: Combination therapy of RY10-4 with the γ-secretase inhibitor DAPT shows promise in treating HER2-amplified breast cancer
Source: PubMed Central journal article supplement (PMC4826195; doi:10.18632/oncotarget.6769), 2015-12-26
Supplement: oncotarget-07-4142-s001.pdf [file oncotarget-07-4142-s001.pdf]

## Combination therapy of RY10-4 with the $\gamma$ -secretase inhibitor DAPT shows promise in treating HER2-amplified breast cancer

### Supplementary Materials

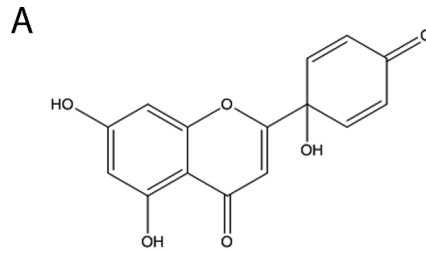

Protoapigenone

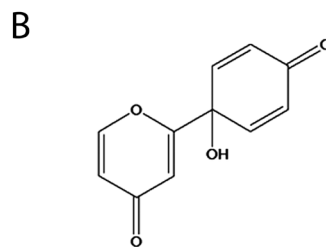

RY10-4

**Supplementary Figure S1:** Chemical structures of (A) Protoapigenone and (B) RY10-4.

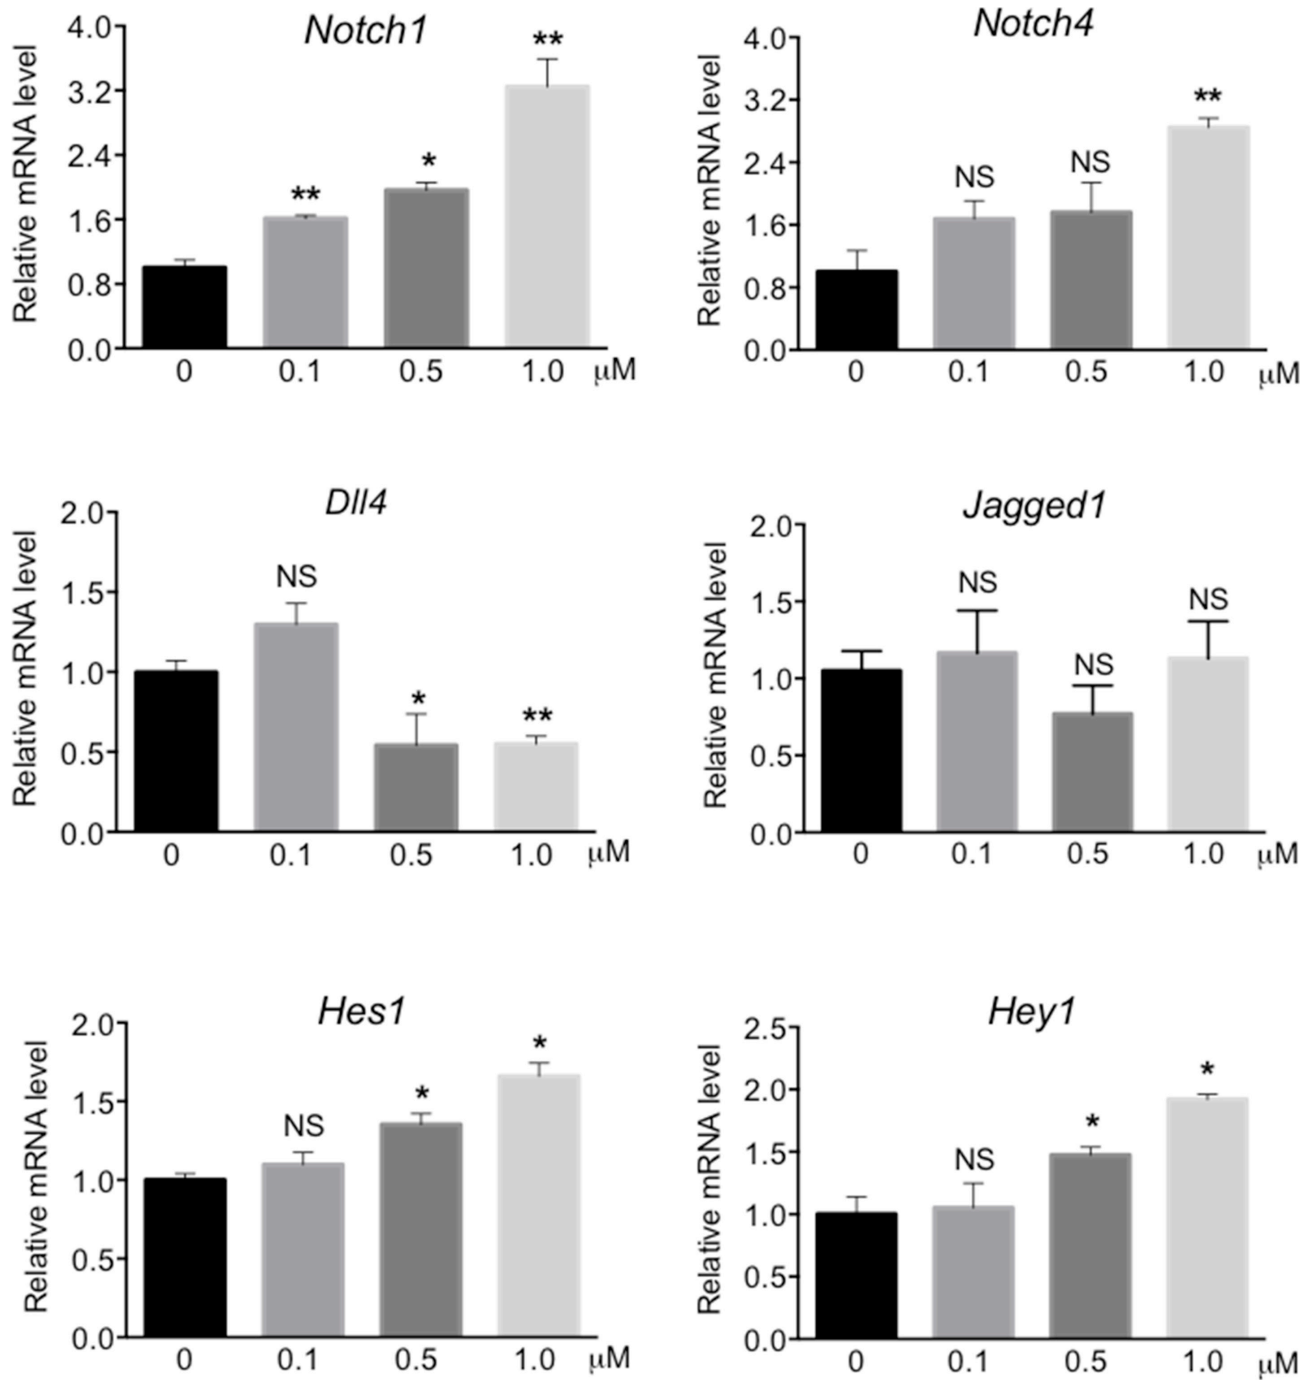

**Supplementary Figure S2: RY10-4 induces Notch signaling in BT474 cells.** Shown is qPCR analysis of Notch1, Notch4, Dll4, Jagged1, Hes1, and Hey1 gene expression in BT474 cells after treatment with different concentrations of RY10-4 over a 6-h time course. Expression of Notch signaling genes was normalized to that of GAPDH. Data represent mean  $\pm$  SD, \* $P$  < 0.05, \*\* $P$  < 0.01, \*\*\* $P$  < 0.001, versus vehicle control.

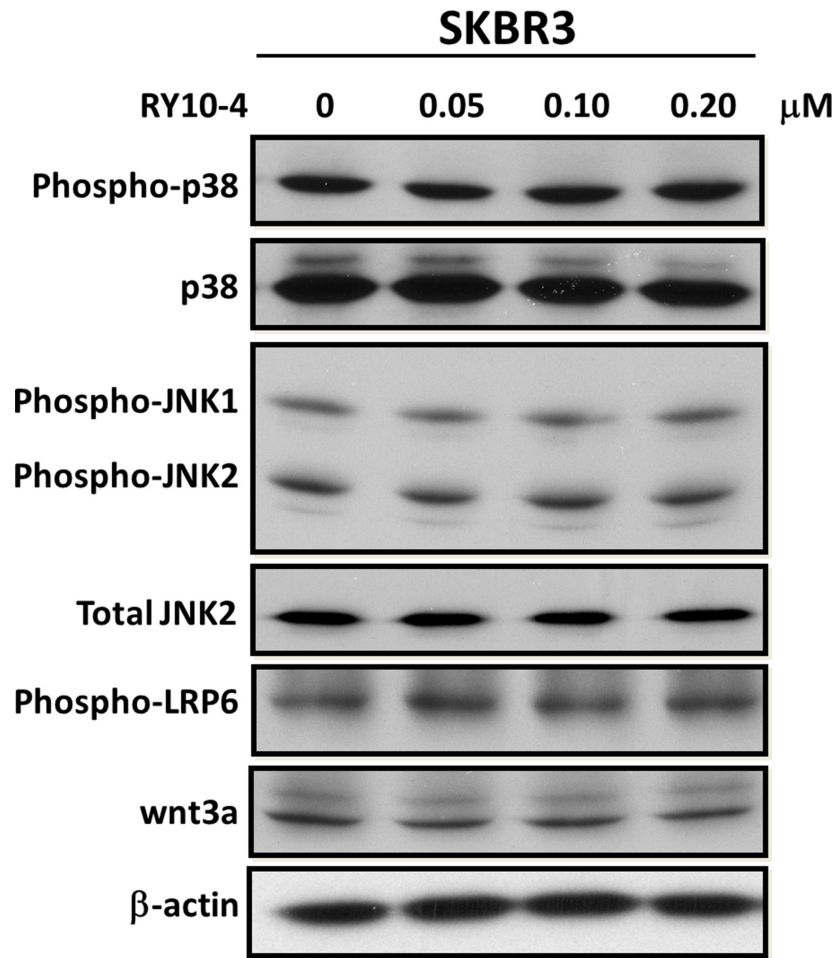

**Supplementary Figure S3: RY10-4 has no effect on MAPK or Wnt signaling.** SKBR3 cells were treated with 0.05, 0.1, or 0.2 μM RY10-4 for 24 h. Western blotting was performed to detect MAPK pathway-related p-p38, total p38, p-JNK1/2, and total JNK1/2, as well as Wnt pathway-related p-LRP6, Wnt 3a, and β-actin.

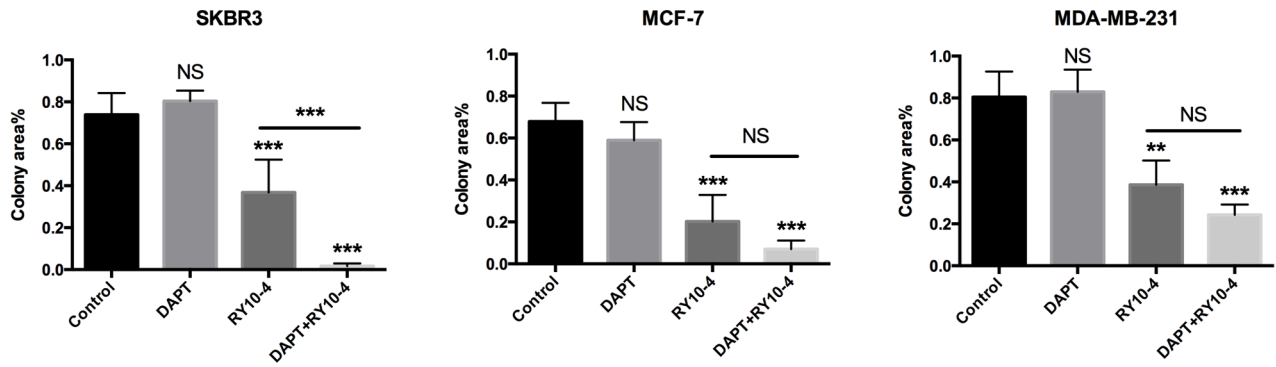

Supplementary Figure S4: Quantification of data from the colony formation assay of Figure 4A.

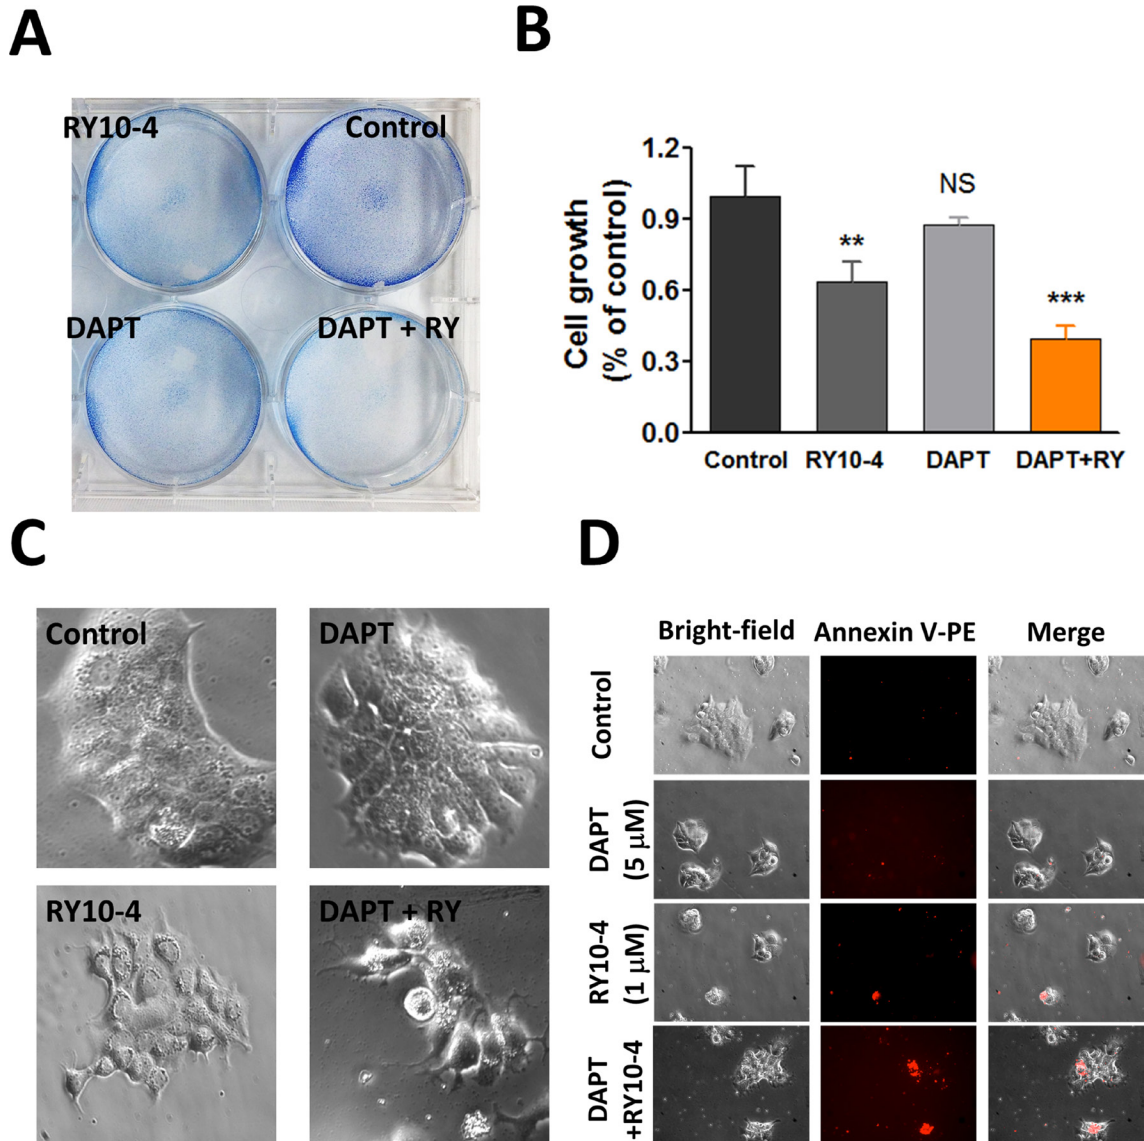

**Supplementary Figure S5: DAPT and RY10-4 have additive effects on the proliferation of BT474 cells.** The effect of DAPT (5 μM), RY10-4 (1 μM), and combination of the two on the growth of BT474 cell was investigated by (A) the colony formation assay and (B) the MTT assay. (C) Shown are representative micrographs of BT474 cells with 5 μM DAPT treatment, 1 μM RY10-4 treatment, or both for 24 h. (D) Annexin-PE staining was used to evaluate cell viability following treatment of different samples. Morphological changes indicative of apoptosis, caused by treatment with 5 μM DAPT, 1 μM RY10-4, or combination of the two for 24 h, were compared by staining cells with an apoptosis probe and detected by fluorescence microscopy. Data represent mean ± SD, \* $P < 0.05$ , \*\* $P < 0.01$ , \*\*\* $P < 0.001$ .

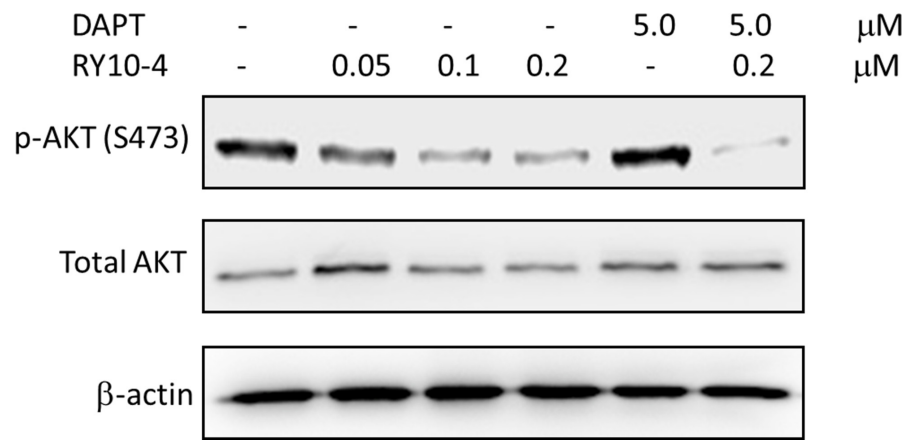

**Supplementary Figure S6: DAPT and RY10-4 have additive effects on suppressing the expression of AKT and p-AKT in BT474 cells.** BT474 cells were treated with only RY10-4 (0.05, 0.1, and 0.2  $\mu\text{M}$ ), only DAPT (5  $\mu\text{M}$ ), or both for 24 h. Protein expression of AKT and p-AKT (S473) was measured by western blotting. Cells treated with vehicle served as control.
